# Supplementary material for: The Genetic Architecture of the Root System during Seedling Emergence in Populus euphratica under Salt Stress and Control Environments
Source: MDPI journal article supplement (doi:10.3390/app14062225), 2024-03-07
Supplement: s1 [file s1]

Archive with 11 entries (11 files):
- Figure S1.pdf
- Figure S1.tiff
- Figure S2.pdf
- Figure S2a.tif
- Figure S2b.tif
- Figure S2c.tif
- Table S1.pdf
- Table S2.pdf
- Table S2.xlsx
- Table S3.pdf
- Table S3.xlsx
