# Supplementary material for: The Genetic Architecture of the Root System during Seedling Emergence in Populus euphratica under Salt Stress and Control Environments
Source: MDPI journal article supplement (doi:10.3390/app14062225), 2024-03-07
Supplement: s1 [file s1 › Figure S1.pdf]

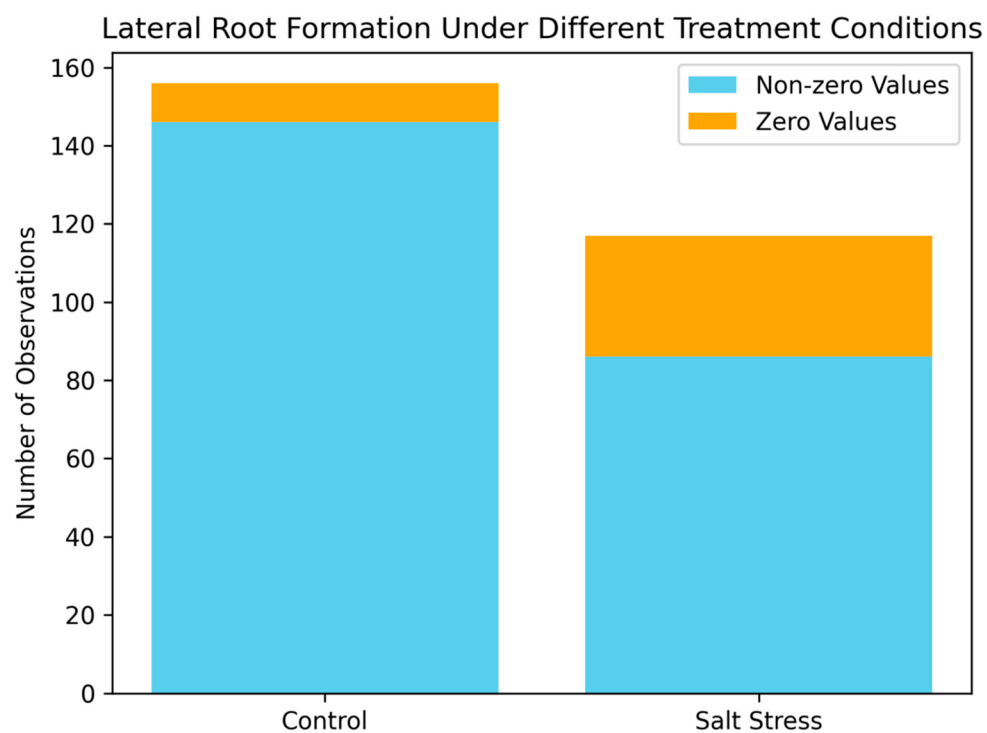

**Figure S1.** Lateral Root Formation Under Different Treatment Conditions. The stacked bar chart shows the counts of non-zero and zero lateral root length observations for both control and salt stress groups. There are 146 non-zero observations and 10 zero observations in the control group, compared to 86 non-zero observations and 31 zero observations in the salt stress group.
