# Supplementary material for: The Genetic Architecture of the Root System during Seedling Emergence in Populus euphratica under Salt Stress and Control Environments
Source: MDPI journal article supplement (doi:10.3390/app14062225), 2024-03-07
Supplement: s1 [file s1 › Figure S2.pdf]

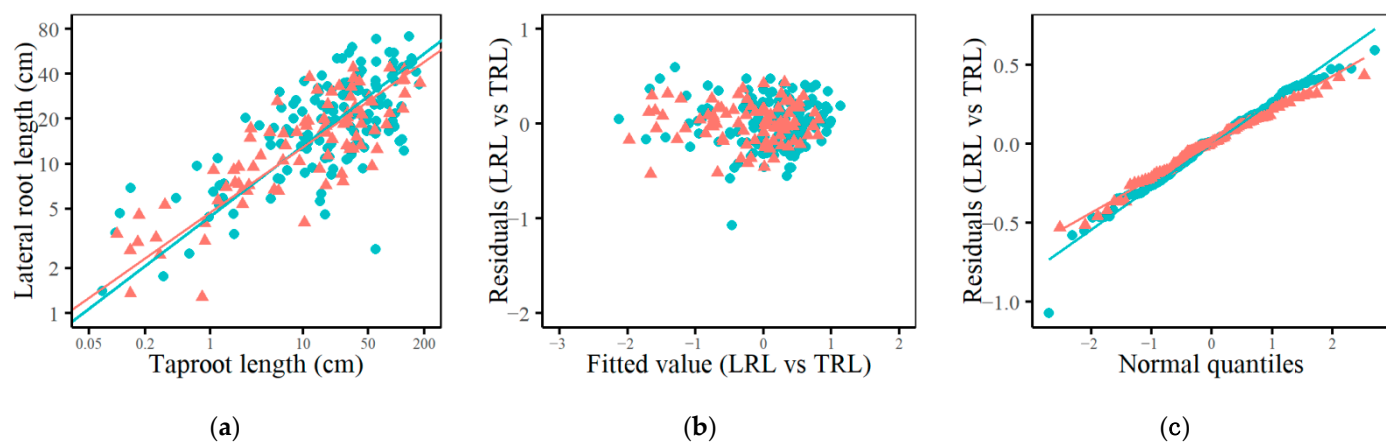

**Figure S2.** Scatterplot (a), residual vs. fits plot (b), normal quantile plot of residuals of taproot length against lateral root length (c), with different labels for the control group (blue circular scatter) and the salt stress group (red triangular scatter).
