# Supplementary material for: The Genetic Architecture of the Root System during Seedling Emergence in Populus euphratica under Salt Stress and Control Environments
Source: MDPI journal article supplement (doi:10.3390/app14062225), 2024-03-07
Supplement: s1 [file s1 › Table S1.pdf]

| Statistical Test    | Factor/Comparison                                              | F-value / Odds Ratio | p-value               | Mean Difference (Diff) | 95% Confidence Interval (CI) | Adjusted p-value ( $p_{adj}$ ) |
|---------------------|----------------------------------------------------------------|----------------------|-----------------------|------------------------|------------------------------|--------------------------------|
| Two-way ANOVA       | Treatment effect (Salt Stress vs. Control)                     | 28.223               | <0.0001               | -                      | -                            | -                              |
| Two-way ANOVA       | Root type (Taproot vs. Lateral Root)                           | 25.156               | <0.0001               | -                      | -                            | -                              |
| Two-way ANOVA       | Treatment × Root Type                                          | 2.734                | 0.0988                | -                      | -                            | -                              |
| Fisher's exact test | Zero Value Proportion (Salt Stress vs. Control, Lateral Roots) | 5.26                 | $5.24 \times 10^{-6}$ | -                      | -                            | -                              |
| Tukey HSD           | Salt Stress: Lateral Root vs. Control: Lateral Root            | -                    | -                     | -12.669                | [-17.353, -7.984]            | <0.0001***                     |
| Tukey HSD           | Control: Taproot vs. Control: Lateral Root                     | -                    | -                     | -11.838                | [-16.474, -7.201]            | <0.0001***                     |
| Tukey HSD           | Salt Stress: Taproot vs. Control: Lateral Root                 | -                    | -                     | -23.944                | [-32.634, -15.252]           | <0.0001***                     |
| Tukey HSD           | Control: Taproot vs. Salt Stress: Lateral Root                 | -                    | -                     | 1.394                  | [-7.296, 10.085]             | 0.9762                         |
| Tukey HSD           | Salt Stress: Taproot vs. Salt Stress: Lateral Root             | -                    | -                     | -7.332                 | [-16.622, 1.959]             | 0.1769                         |
| Tukey HSD           | Salt Stress: Taproot vs. Control: Taproot                      | -                    | -                     | -8.726                 | [-17.416, -0.035]            | 0.0486*                        |

**Table S1.** Summary of Statistical Analyses on Root Growth Under Salt Stress and Control Conditions in *Populus euphratica*.
