# Supplementary material for: The Genetic Architecture of the Root System during Seedling Emergence in Populus euphratica under Salt Stress and Control Environments
Source: MDPI journal article supplement (doi:10.3390/app14062225), 2024-03-07
Supplement: s1 [file s1 › Table S2.pdf]

| labels | snpnames | Lin<br>kage | Genetic_<br>Distances.<br>cM. | Marker_ID   | Description                                                                                                                    | Scientific Name            | Max<br>Score | Total<br>Score | Query<br>Cover | E value  |
|--------|----------|-------------|-------------------------------|-------------|--------------------------------------------------------------------------------------------------------------------------------|----------------------------|--------------|----------------|----------------|----------|
| S1     | 384      | lg1         | 198.33                        | lm_ll_9859  | PREDICTED: <i>Populus trichocarpa</i>                                                                                          |                            |              |                |                |          |
| S2     | 388      | lg1         | 200.51                        | lm_ll_10319 | transcription factor MYB83 (LOC7463851), mRNA                                                                                  | <i>Populus trichocarpa</i> | 126          | 126            | 61%            | 5.00E-25 |
| S3     | 539      | lg1         | 266.27                        | lm_ll_8813  |                                                                                                                                |                            |              |                |                |          |
| S4     | 654      | lg1         | 319.71                        | lm_ll_7100  | PREDICTED: <i>Populus euphratica</i> putative glucose-6-phosphate 1-epimerase (LOC105127368), mRNA                             |                            |              |                |                |          |
| S5     | 825      | lg1         | 408.58                        | lm_ll_10880 |                                                                                                                                | <i>Populus euphratica</i>  | 198          | 198            | 100%           | 1.00E-46 |
| S6     | 849      | lg1         | 423.84                        | nn_np_11246 | PREDICTED: <i>Populus alba</i> protein ARABIDILLO 1-like (LOC118036755), transcript variant X3, mRNA                           | <i>Populus alba</i>        | 158          | 158            | 80%            | 2.00E-34 |
| S7     | 850      | lg1         | 423.84                        | nn_np_8244  | PREDICTED: <i>Populus trichocarpa</i> endoglucanase 25 (LOC7491486), mRNA                                                      | <i>Populus trichocarpa</i> | 198          | 198            | 100%           | 1.00E-46 |
| S8     | 854      | lg1         | 425.13                        | nn_np_3325  | PREDICTED: <i>Populus euphratica</i> pentatricopeptide repeat-containing protein At3g57430, chloroplastic (LOC105113669), mRNA | <i>Populus euphratica</i>  | 198          | 198            | 100%           | 1.00E-46 |
| S9     | 855      | lg1         | 426.17                        | nn_np_11515 | PREDICTED: <i>Populus alba</i> peptidyl-prolyl cis-trans isomerase                                                             |                            |              |                |                |          |
| S10    | 856      | lg1         | 426.17                        | nn_np_9847  | FKBP13, chloroplastic-like (LOC118036805), mRNA                                                                                | <i>Populus alba</i>        | 87.9         | 87.9           | 42%            | 2.00E-13 |
| S11    | 859      | lg1         | 428.55                        | nn_np_9695  | PREDICTED: <i>Populus</i>                                                                                                      | <i>Populus alba</i>        | 198          | 198            | 100%           | 1.00E-46 |

|     |     |     |        |             |                                                                                             |                           |     |     |      |          |
|-----|-----|-----|--------|-------------|---------------------------------------------------------------------------------------------|---------------------------|-----|-----|------|----------|
|     |     |     |        |             | <i>alba</i> esterase-like<br>(LOC118042355),<br>mRNA                                        |                           |     |     |      |          |
| S12 | 860 | lg1 | 428.55 | nn_np_12543 | PREDICTED: <i>Populus euphratica</i>                                                        |                           |     |     |      |          |
| S13 | 863 | lg1 | 430.46 | nn_np_174   | uncharacterized<br>LOC105113656<br>(LOC105113656),<br>ncRNA                                 | <i>Populus euphratica</i> | 198 | 198 | 100% | 1.00E-46 |
| S14 | 864 | lg1 | 430.46 | nn_np_8580  |                                                                                             |                           |     |     |      |          |
| S15 | 868 | lg1 | 433.61 | nn_np_10165 | PREDICTED: <i>Populus euphratica</i>                                                        |                           |     |     |      |          |
| S16 | 869 | lg1 | 436.65 | nn_np_10694 | uncharacterized<br>LOC105133751<br>(LOC105133751),<br>ncRNA                                 | <i>Populus euphratica</i> | 204 | 204 | 100% | 2.00E-48 |
| S17 | 870 | lg1 | 436.77 | nn_np_3042  |                                                                                             |                           |     |     |      |          |
| S18 | 871 | lg1 | 436.85 | nn_np_10269 |                                                                                             |                           |     |     |      |          |
| S19 | 872 | lg1 | 436.86 | nn_np_5995  | PREDICTED: <i>Populus euphratica</i> protein                                                |                           |     |     |      |          |
| S20 | 875 | lg1 | 438.51 | nn_np_12747 | NRT1/ PTR FAMILY<br>6.1 (LOC105133784),<br>transcript variant X5,<br>mRNA                   | <i>Populus euphratica</i> | 198 | 198 | 100% | 1.00E-46 |
| S21 | 877 | lg1 | 438.51 | nn_np_11694 |                                                                                             |                           |     |     |      |          |
| S22 | 881 | lg1 | 441.33 | nn_np_10893 |                                                                                             |                           |     |     |      |          |
| S23 | 882 | lg1 | 441.49 | nn_np_9467  | PREDICTED: <i>Populus euphratica</i> histidine                                              |                           |     |     |      |          |
| S24 | 889 | lg1 | 442.75 | nn_np_5989  | kinase 3-like<br>(LOC105133705),<br>transcript variant X1,<br>misc_RNA                      | <i>Populus euphratica</i> | 204 | 204 | 100% | 2.00E-48 |
| S25 | 890 | lg1 | 442.75 | nn_np_11954 | PREDICTED: <i>Populus euphratica</i> probable                                               |                           |     |     |      |          |
| S26 | 910 | lg1 | 450.82 | nn_np_11836 | leucine-rich repeat<br>receptor-like protein<br>kinase At2g33170<br>(LOC105116523),<br>mRNA | <i>Populus euphratica</i> | 198 | 198 | 100% | 1.00E-46 |

|     |      |     |        |             |                                                                                                               |                               |      |      |      |          |
|-----|------|-----|--------|-------------|---------------------------------------------------------------------------------------------------------------|-------------------------------|------|------|------|----------|
| S27 | 1491 | lg2 | 244.2  | hk_hk_2444  |                                                                                                               |                               |      |      |      |          |
| S28 | 1660 | lg3 | 12.51  | lm_ll_10836 |                                                                                                               |                               |      |      |      |          |
|     |      |     |        |             | PREDICTED: <i>Populus euphratica</i> E3                                                                       |                               |      |      |      |          |
| S29 | 1765 | lg3 | 64.9   | hk_hk_2098  | ubiquitin-protein ligase HERC2 (LOC105138450), mRNA                                                           | <i>Populus euphratica</i>     | 204  | 204  | 100% | 2.00E-48 |
|     |      |     |        |             | PREDICTED: <i>Populus alba</i> aspartic proteinase-like protein 1 (LOC118049145), transcript variant X2, mRNA | <i>Populus alba</i>           | 130  | 130  | 66%  | 4.00E-26 |
| S31 | 2258 | lg4 | 21.34  | hk_hk_1961  | <i>Populus trichocarpa</i> clone POP120-A02, complete sequence                                                | <i>Populus trichocarpa</i>    | 176  | 176  | 100% | 5.00E-40 |
|     |      |     |        |             | PREDICTED: <i>Phalaenopsis equestris</i> uncharacterized LOC110037592 (LOC110037592), partial mRNA            | <i>Phalaenopsis equestris</i> | 159  | 159  | 100% | 5.00E-35 |
| S33 | 2532 | lg4 | 158.78 | hk_hk_2687  |                                                                                                               |                               |      |      |      |          |
| S34 | 2535 | lg4 | 159.43 | hk_hk_1366  | <i>Populus trichocarpa</i> clone POP043-I07, complete sequence                                                | <i>Populus trichocarpa</i>    | 156  | 156  | 98%  | 7.00E-34 |
| S35 | 2537 | lg4 | 160.27 | hk_hk_2271  | <i>Populus trichocarpa</i> clone POP043-I07, complete sequence                                                | <i>Populus trichocarpa</i>    | 159  | 159  | 100% | 5.00E-35 |
| S36 | 2538 | lg4 | 160.93 | hk_hk_2206  | <i>Populus trichocarpa</i> clone POP004-I13, complete sequence                                                | <i>Populus trichocarpa</i>    | 73.1 | 73.1 | 81%  | 7.00E-09 |
| S37 | 2541 | lg4 | 163.44 | hk_hk_2608  | <i>Jasminum sambac</i> cultivar Hutoumoli linkage group Lg10                                                  | <i>Jasminum sambac</i>        | 80.5 | 80.5 | 81%  | 4.00E-11 |
|     |      |     |        |             | PREDICTED: <i>Populus trichocarpa</i> uncharacterized LOC112325761 (LOC112325761), mRNA                       | <i>Populus trichocarpa</i>    | 182  | 182  | 100% | 1.00E-41 |
| S39 | 2545 | lg4 | 165.37 | hk_hk_2306  | <i>Populus trichocarpa</i>                                                                                    | <i>Populus trichocarpa</i>    | 106  | 106  | 98%  | 7.00E-19 |

|     |      |     |        |             |                                                                                                                  |                            |     |     |      |          |
|-----|------|-----|--------|-------------|------------------------------------------------------------------------------------------------------------------|----------------------------|-----|-----|------|----------|
|     |      |     |        |             | clone POP007-E06,<br>complete sequence<br><i>Populus trichocarpa</i>                                             |                            |     |     |      |          |
| S40 | 2546 | lg4 | 165.65 | hk_hk_1449  | clone POP074-L11,<br>complete sequence                                                                           | <i>Populus trichocarpa</i> | 159 | 240 | 100% | 5.00E-35 |
| S41 | 2548 | lg4 | 165.87 | hk_hk_2945  |                                                                                                                  |                            |     |     |      |          |
| S42 | 2550 | lg4 | 166    | hk_hk_1057  | <i>Populus trichocarpa</i><br>clone POP006-H09,<br>complete sequence                                             | <i>Populus trichocarpa</i> | 171 | 171 | 100% | 2.00E-38 |
| S43 | 2551 | lg4 | 166.31 | hk_hk_2952  | <i>Populus trichocarpa</i><br>clone POP108-P17,<br>complete sequence                                             | <i>Populus trichocarpa</i> | 148 | 411 | 100% | 1.00E-31 |
| S44 | 2552 | lg4 | 167    | hk_hk_1457  | <i>Populus trichocarpa</i><br>clone POP091-F21,<br>complete sequence                                             | <i>Populus trichocarpa</i> | 187 | 187 | 100% | 2.00E-43 |
| S45 | 2593 | lg4 | 185.12 | nn_np_5996  |                                                                                                                  |                            |     |     |      |          |
| S46 | 2762 | lg4 | 270.86 | nn_np_3833  | PREDICTED: <i>Populus trichocarpa</i> putative<br>F-box/kelch-repeat<br>protein At1g20790<br>(LOC7494715), mRNA  | <i>Populus trichocarpa</i> | 191 | 191 | 99%  | 2.00E-44 |
| S47 | 3035 | lg5 | 130.52 | nn_np_5908  |                                                                                                                  |                            |     |     |      |          |
| S48 | 3046 | lg5 | 138.77 | hk_hk_1933  |                                                                                                                  |                            |     |     |      |          |
| S49 | 3136 | lg5 | 197.17 | nn_np_10756 | PREDICTED: <i>Populus trichocarpa</i> protease<br>Do-like 10,<br>mitochondrial<br>(LOC18102668),<br>partial mRNA | <i>Populus trichocarpa</i> | 122 | 122 | 81%  | 7.00E-24 |
| S50 | 3361 | lg6 | 47.74  | lm_ll_11231 | <i>Populus trichocarpa</i><br>clone POP017-N07,<br>complete sequence                                             | <i>Populus trichocarpa</i> | 148 | 148 | 100% | 1.00E-31 |
| S51 | 3562 | lg6 | 144.19 | lm_ll_5238  | PREDICTED: <i>Populus euphratica</i> putative<br>DNA-binding protein<br>ESCAROLA<br>(LOC105132215),<br>mRNA      | <i>Populus euphratica</i>  | 204 | 204 | 100% | 2.00E-48 |
| S52 | 3566 | lg6 | 146.48 | lm_ll_10915 | PREDICTED: <i>Populus euphratica</i> protein<br>FIZZY-RELATED<br>2-like<br>(LOC105132191),<br>mRNA               | <i>Populus euphratica</i>  | 185 | 185 | 90%  | 8.00E-43 |

|     |      |      |        |             |                                                                                                                                         |                            |      |      |      |          |
|-----|------|------|--------|-------------|-----------------------------------------------------------------------------------------------------------------------------------------|----------------------------|------|------|------|----------|
| S53 | 3574 | lg6  | 147.85 | lm_ll_7994  |                                                                                                                                         |                            |      |      |      |          |
| S54 | 3580 | lg6  | 151.15 | hk_hk_3039  |                                                                                                                                         |                            |      |      |      |          |
| S55 | 3591 | lg6  | 155.62 | hk_hk_3195  |                                                                                                                                         |                            |      |      |      |          |
| S56 | 4216 | lg7  | 286.52 | nn_np_10799 |                                                                                                                                         |                            |      |      |      |          |
| S57 | 4227 | lg7  | 286.99 | nn_np_12765 |                                                                                                                                         |                            |      |      |      |          |
|     |      |      |        |             | PREDICTED: <i>Populus</i><br><i>trichocarpa</i><br>uncharacterized<br>LOC7463304<br>(LOC7463304),<br>transcript variant X2,<br>mRNA     | <i>Populus trichocarpa</i> | 198  | 198  | 100% | 1.00E-46 |
| S58 | 5479 | lg11 | 29.93  | lm_ll_5723  |                                                                                                                                         |                            |      |      |      |          |
|     |      |      |        |             | PREDICTED: <i>Populus</i><br><i>euphratica</i><br>uncharacterized<br>LOC105112383<br>(LOC105112383),<br>mRNA                            | <i>Populus euphratica</i>  | 176  | 176  | 100% | 5.00E-40 |
| S59 | 5485 | lg11 | 30.09  | lm_ll_11763 |                                                                                                                                         |                            |      |      |      |          |
|     |      |      |        |             | <i>Populus trichocarpa</i><br>clone ACSB2753-D09,<br>complete sequence                                                                  | <i>Populus trichocarpa</i> | 169  | 169  | 99%  | 8.00E-38 |
| S60 | 5491 | lg11 | 30.09  | lm_ll_7120  |                                                                                                                                         |                            |      |      |      |          |
|     |      |      |        |             | PREDICTED: <i>Populus</i><br><i>alba</i> uncharacterized<br>LOC118051271<br>(LOC118051271),<br>mRNA                                     | <i>Populus alba</i>        | 80.5 | 80.5 | 39%  | 4.00E-11 |
| S61 | 5750 | lg12 | 0      | hk_hk_2068  |                                                                                                                                         |                            |      |      |      |          |
| S62 | 5751 | lg12 | 0      | hk_hk_2300  |                                                                                                                                         |                            |      |      |      |          |
| S63 | 5754 | lg12 | 2.04   | hk_hk_2654  |                                                                                                                                         |                            |      |      |      |          |
| S64 | 5787 | lg12 | 36.81  | lm_ll_8004  |                                                                                                                                         |                            |      |      |      |          |
| S65 | 6085 | lg12 | 169.67 | lm_ll_6968  |                                                                                                                                         |                            |      |      |      |          |
|     |      |      |        |             | PREDICTED: <i>Populus</i><br><i>euphratica</i><br>wall-associated<br>receptor kinase-like 10<br>(LOC105120890),<br>mRNA                 | <i>Populus euphratica</i>  | 204  | 204  | 100% | 2.00E-48 |
| S66 | 6115 | lg12 | 192.69 | lm_ll_7771  |                                                                                                                                         |                            |      |      |      |          |
| S67 | 6117 | lg12 | 192.7  | lm_ll_5873  |                                                                                                                                         |                            |      |      |      |          |
|     |      |      |        |             | PREDICTED: <i>Populus</i><br><i>euphratica</i> 5'-3'<br>exoribonuclease 4-like<br>(LOC105110438),<br>transcript variant X5,<br>misc_RNA | <i>Populus euphratica</i>  | 165  | 165  | 80%  | 1.00E-36 |
| S68 | 6209 | lg13 | 78.72  | hk_hk_1264  |                                                                                                                                         |                            |      |      |      |          |
| S69 | 6556 | lg14 | 79.98  | hk_hk_3108  | <i>Populus trichocarpa</i>                                                                                                              | <i>Populus trichocarpa</i> | 182  | 182  | 100% | 1.00E-41 |

|     |      |      |       |             |                                                                                                                                                                                 |                            |     |     |      |          |
|-----|------|------|-------|-------------|---------------------------------------------------------------------------------------------------------------------------------------------------------------------------------|----------------------------|-----|-----|------|----------|
| S70 | 6606 | lg14 | 86.35 | lm_ll_7240  | clone 13838686<br>integrase mRNA,<br>complete cds                                                                                                                               |                            |     |     |      |          |
| S71 | 7186 | lg16 | 0     | lm_ll_7848  | PREDICTED: <i>Populus euphratica</i> probable<br>inactive receptor<br>kinase At5g58300<br>(LOC105108877),<br>transcript variant X4,<br>mRNA                                     | <i>Populus euphratica</i>  | 204 | 204 | 100% | 2.00E-48 |
| S72 | 7491 | lg17 | 0.49  | nn_np_7356  | PREDICTED: <i>Populus euphratica</i><br>uncharacterized<br>GPI-anchored protein<br>At1g61900-like<br>(LOC105142180),<br>transcript variant X2,<br>mRNA                          | <i>Populus euphratica</i>  | 204 | 204 | 100% | 2.00E-48 |
| S73 | 7492 | lg17 | 1.1   | nn_np_10281 | <i>Populus trichocarpa</i><br>clone POP050-O20,<br>complete sequence                                                                                                            | <i>Populus trichocarpa</i> | 117 | 117 | 100% | 3.00E-22 |
| S74 | 7639 | lg17 | 64.81 | hk_hk_1498  |                                                                                                                                                                                 |                            |     |     |      |          |
| S75 | 7660 | lg17 | 74.28 | hk_hk_2528  |                                                                                                                                                                                 |                            |     |     |      |          |
| S76 | 7701 | lg17 | 91.42 | hk_hk_2354  | PREDICTED: <i>Populus euphratica</i><br>pentatricopeptide<br>repeat-containing<br>protein At4g21705,<br>mitochondrial-like<br>(LOC105129198),<br>transcript variant X1,<br>mRNA | <i>Populus euphratica</i>  | 204 | 204 | 100% | 2.00E-48 |
| S77 | 7816 | lg18 | 19.32 | nn_np_5502  |                                                                                                                                                                                 |                            |     |     |      |          |
| S78 | 7843 | lg18 | 34.43 | lm_ll_12799 |                                                                                                                                                                                 |                            |     |     |      |          |
| S79 | 7866 | lg18 | 51.27 | hk_hk_3130  | PREDICTED: <i>Populus alba</i> protein<br>SUPPRESSOR OF<br>K(+) TRANSPORT<br>GROWTH DEFECT<br>1-like<br>(LOC118060148),<br>transcript variant X3,<br>mRNA                       | <i>Populus alba</i>        | 204 | 204 | 100% | 2.00E-48 |

|     |      |      |        |             |                                                                                                                      |                            |     |     |      |          |
|-----|------|------|--------|-------------|----------------------------------------------------------------------------------------------------------------------|----------------------------|-----|-----|------|----------|
| S80 | 7990 | lg18 | 127.73 | nn_np_11657 | PREDICTED: <i>Populus alba</i> UBP1-associated protein 2C-like (LOC118062572), mRNA                                  | <i>Populus alba</i>        | 198 | 198 | 100% | 1.00E-46 |
| S81 | 7993 | lg18 | 133.97 | nn_np_9127  |                                                                                                                      |                            |     |     |      |          |
| S82 | 7999 | lg18 | 135.97 | nn_np_8633  |                                                                                                                      |                            |     |     |      |          |
| S83 | 8003 | lg18 | 140.51 | nn_np_381   |                                                                                                                      |                            |     |     |      |          |
| S84 | 8004 | lg18 | 144.34 | hk_hk_1414  |                                                                                                                      |                            |     |     |      |          |
| S85 | 8009 | lg18 | 150.12 | nn_np_10664 | PREDICTED: <i>Populus euphratica</i> pentatricopeptide repeat-containing protein At2g33760-like (LOC105128035), mRNA | <i>Populus euphratica</i>  | 204 | 204 | 100% | 2.00E-48 |
| S86 | 8011 | lg18 | 150.59 | nn_np_6308  |                                                                                                                      |                            |     |     |      |          |
| S87 | 8016 | lg18 | 153.52 | hk_hk_1488  | <i>Populus trichocarpa</i> clone Pop1-49O2, complete sequence                                                        | <i>Populus trichocarpa</i> | 119 | 119 | 99%  | 9.00E-23 |
| S88 | 8020 | lg18 | 154.4  | hk_hk_3089  | <i>Populus trichocarpa</i> clone Pop1-49O2, complete sequence                                                        | <i>Populus trichocarpa</i> | 119 | 119 | 99%  | 9.00E-23 |
| S89 | 8245 | lg19 | 84.22  | hk_hk_2795  | PREDICTED: <i>Populus alba</i> uncharacterized LOC118056755 (LOC118056755), ncRNA                                    | <i>Populus alba</i>        | 156 | 156 | 90%  | 7.00E-34 |
| S90 | 8246 | lg19 | 84.22  | hk_hk_861   | <i>Populus trichocarpa</i> clone POP024-G19, complete sequence                                                       | <i>Populus trichocarpa</i> | 102 | 272 | 55%  | 9.00E-18 |
| S91 | 8293 | lg19 | 119.22 | lm_ll_11569 | <i>Populus trichocarpa</i> clone POP002-A24, complete sequence                                                       | <i>Populus trichocarpa</i> | 176 | 176 | 100% | 5.00E-40 |
