# Supplementary material for: The Genetic Architecture of the Root System during Seedling Emergence in Populus euphratica under Salt Stress and Control Environments
Source: MDPI journal article supplement (doi:10.3390/app14062225), 2024-03-07
Supplement: s1 [file s1 › Table S2.xlsx]

## Sheet: Sheet1
labels	snpnames	Linkage	Genetic_Distances.cM.	Marker_ID	Description	Scientific Name	Max Score	Total Score	Query Cover	E value	Per. ident	Acc. Len	Accession
S1	384	lg1	198.33	lm_ll_9859
S2	388	lg1	200.51	lm_ll_10319	PREDICTED: Populus trichocarpa transcription factor MYB83 (LOC7463851), mRNA	Populus trichocarpa	126	126	0.61	5e-25	100	1941	XM_002299908.3
S3	539	lg1	266.27	lm_ll_8813
S4	654	lg1	319.71	lm_ll_7100
S5	825	lg1	408.58	lm_ll_10880	PREDICTED: Populus euphratica putative glucose-6-phosphate 1-epimerase (LOC105127368), mRNA	Populus euphratica	198	198	1	1e-46	99.09	1860	XM_011028638.1
S6	849	lg1	423.84	nn_np_11246	PREDICTED: Populus alba protein ARABIDILLO 1-like (LOC118036755), transcript variant X3, mRNA	Populus alba	158	158	0.8	2e-34	98.86	3495	XM_035042548.1
S7	850	lg1	423.84	nn_np_8244	PREDICTED: Populus trichocarpa endoglucanase 25 (LOC7491486), mRNA	Populus trichocarpa	198	198	1	1e-46	99.09	2782	XM_002299369.3
S8	854	lg1	425.13	nn_np_3325	PREDICTED: Populus euphratica pentatricopeptide repeat-containing protein At3g57430, chloroplastic (LOC105113669), mRNA	Populus euphratica	198	198	1	1e-46	99.09	3051	XM_011009932.1
S9	855	lg1	426.17	nn_np_11515
S10	856	lg1	426.17	nn_np_9847	PREDICTED: Populus alba peptidyl-prolyl cis-trans isomerase FKBP13, chloroplastic-like (LOC118036805), mRNA	Populus alba	87.9	87.9	0.42	2e-13	100	919	XM_035042644.1
S11	859	lg1	428.55	nn_np_9695	PREDICTED: Populus alba esterase-like (LOC118042355), mRNA	Populus alba	198	198	1	1e-46	99.09	1706	XM_035050001.1
S12	860	lg1	428.55	nn_np_12543
S13	863	lg1	430.46	nn_np_174	PREDICTED: Populus euphratica uncharacterized LOC105113656 (LOC105113656), ncRNA	Populus euphratica	198	198	1	1e-46	99.09	971	XR_840003.1
S14	864	lg1	430.46	nn_np_8580
S15	868	lg1	433.61	nn_np_10165
S16	869	lg1	436.65	nn_np_10694	PREDICTED: Populus euphratica uncharacterized LOC105133751 (LOC105133751), ncRNA	Populus euphratica	204	204	1	2e-48	100	296	XR_843860.1
S17	870	lg1	436.77	nn_np_3042
S18	871	lg1	436.85	nn_np_10269
S19	872	lg1	436.86	nn_np_5995
S20	875	lg1	438.51	nn_np_12747	PREDICTED: Populus euphratica protein NRT1/ PTR FAMILY 6.1 (LOC105133784), transcript variant X5, mRNA	Populus euphratica	198	198	1	1e-46	99.09	2218	XM_011037900.1
S21	877	lg1	438.51	nn_np_11694
S22	881	lg1	441.33	nn_np_10893
S23	882	lg1	441.49	nn_np_9467
S24	889	lg1	442.75	nn_np_5989	PREDICTED: Populus euphratica histidine kinase 3-like (LOC105133705), transcript variant X1, misc_RNA	Populus euphratica	204	204	1	2e-48	100	4528	XR_843849.1
S25	890	lg1	442.75	nn_np_11954
S26	910	lg1	450.82	nn_np_11836	PREDICTED: Populus euphratica probable leucine-rich repeat receptor-like protein kinase At2g33170 (LOC105116523), mRNA	Populus euphratica	198	198	1	1e-46	99.09	4474	XM_011013920.1
S27	1491	lg2	244.2	hk_hk_2444
S28	1660	lg3	12.51	lm_ll_10836
S29	1765	lg3	64.9	hk_hk_2098	PREDICTED: Populus euphratica E3 ubiquitin-protein ligase HERC2 (LOC105138450), mRNA	Populus euphratica	204	204	1	2e-48	100	3893	XM_011044520.1
S30	1789	lg3	81	hk_hk_644	PREDICTED: Populus alba aspartic proteinase-like protein 1 (LOC118049145), transcript variant X2, mRNA	Populus alba	130	130	0.66	4e-26	98.65	1655	XM_035059053.1
S31	2258	lg4	21.34	hk_hk_1961	Populus trichocarpa clone POP120-A02, complete sequence	Populus trichocarpa	176	176	1	5e-40	95.45	92793	AC210556.1
S32	2434	lg4	131.52	hk_hk_399	PREDICTED: Phalaenopsis equestris uncharacterized LOC110037592 (LOC110037592), partial mRNA	Phalaenopsis equestris	159	159	1	5e-35	92.73	1380	XM_020742278.1
S33	2532	lg4	158.78	hk_hk_2687
S34	2535	lg4	159.43	hk_hk_1366	Populus trichocarpa clone POP043-I07, complete sequence	Populus trichocarpa	156	156	0.98	7e-34	92.66	168289	AC214032.1
S35	2537	lg4	160.27	hk_hk_2271	Populus trichocarpa clone POP043-I07, complete sequence	Populus trichocarpa	159	159	1	5e-35	92.73	168289	AC214032.1
S36	2538	lg4	160.93	hk_hk_2206	Populus trichocarpa clone POP004-I13, complete sequence	Populus trichocarpa	73.1	73.1	0.81	7e-09	81.52	116857	AC213084.1
S37	2541	lg4	163.44	hk_hk_2608	Jasminum sambac cultivar Hutoumoli linkage group Lg10	Jasminum sambac	80.5	80.5	0.81	4e-11	83.33	35955718	CP073641.1
S38	2543	lg4	164.49	hk_hk_2720	PREDICTED: Populus trichocarpa uncharacterized LOC112325761 (LOC112325761), mRNA	Populus trichocarpa	182	182	1	1e-41	96.36	2247	XM_024592772.1
S39	2545	lg4	165.37	hk_hk_2306	Populus trichocarpa clone POP007-E06, complete sequence	Populus trichocarpa	106	106	0.98	7e-19	84.26	138230	AC212924.1
S40	2546	lg4	165.65	hk_hk_1449	Populus trichocarpa clone POP074-L11, complete sequence	Populus trichocarpa	159	240	1	5e-35	92.73	102651	AC216459.1
S41	2548	lg4	165.87	hk_hk_2945
S42	2550	lg4	166	hk_hk_1057	Populus trichocarpa clone POP006-H09, complete sequence	Populus trichocarpa	171	171	1	2e-38	94.55	168295	AC212923.1
S43	2551	lg4	166.31	hk_hk_2952	Populus trichocarpa clone POP108-P17, complete sequence	Populus trichocarpa	148	411	1	1e-31	92.38	89954	AC214036.1
S44	2552	lg4	167	hk_hk_1457	Populus trichocarpa clone POP091-F21, complete sequence	Populus trichocarpa	187	187	1	2e-43	97.27	116205	AC213159.1
S45	2593	lg4	185.12	nn_np_5996
S46	2762	lg4	270.86	nn_np_3833	PREDICTED: Populus trichocarpa putative F-box/kelch-repeat protein At1g20790 (LOC7494715), mRNA	Populus trichocarpa	191	191	0.99	2e-44	98.17	1780	XM_002307773.2
S47	3035	lg5	130.52	nn_np_5908
S48	3046	lg5	138.77	hk_hk_1933
S49	3136	lg5	197.17	nn_np_10756	PREDICTED: Populus trichocarpa protease Do-like 10, mitochondrial (LOC18102668), partial mRNA	Populus trichocarpa	122	122	0.81	7e-24	91.11	1515	XM_024610707.1
S50	3361	lg6	47.74	lm_ll_11231	Populus trichocarpa clone POP017-N07, complete sequence	Populus trichocarpa	148	148	1	1e-31	90.91	87548	AC216912.1
S51	3562	lg6	144.19	lm_ll_5238	PREDICTED: Populus euphratica putative DNA-binding protein ESCAROLA (LOC105132215), mRNA	Populus euphratica	204	204	1	2e-48	100	1818	XM_011035564.1
S52	3566	lg6	146.48	lm_ll_10915	PREDICTED: Populus euphratica protein FIZZY-RELATED 2-like (LOC105132191), mRNA	Populus euphratica	185	185	0.9	8e-43	100	2054	XM_011035534.1
S53	3574	lg6	147.85	lm_ll_7994
S54	3580	lg6	151.15	hk_hk_3039
S55	3591	lg6	155.62	hk_hk_3195
S56	4216	lg7	286.52	nn_np_10799
S57	4227	lg7	286.99	nn_np_12765
S58	5479	lg11	29.93	lm_ll_5723	PREDICTED: Populus trichocarpa uncharacterized LOC7463304 (LOC7463304), transcript variant X2, mRNA	Populus trichocarpa	198	198	1	1e-46	99.09	2393	XM_024608034.1
S59	5485	lg11	30.09	lm_ll_11763	PREDICTED: Populus euphratica uncharacterized LOC105112383 (LOC105112383), mRNA	Populus euphratica	176	176	1	5e-40	95.45	1440	XM_011008079.1
S60	5491	lg11	30.09	lm_ll_7120	Populus trichocarpa clone ACSB2753-D09, complete sequence	Populus trichocarpa	169	169	0.99	8e-38	94.5	33380	AC211803.1
S61	5750	lg12	0	hk_hk_2068	PREDICTED: Populus alba uncharacterized LOC118051271 (LOC118051271), mRNA	Populus alba	80.5	80.5	0.39	4e-11	100	6717	XM_035061905.1
S62	5751	lg12	0	hk_hk_2300
S63	5754	lg12	2.04	hk_hk_2654
S64	5787	lg12	36.81	lm_ll_8004
S65	6085	lg12	169.67	lm_ll_6968
S66	6115	lg12	192.69	lm_ll_7771	PREDICTED: Populus euphratica wall-associated receptor kinase-like 10 (LOC105120890), mRNA	Populus euphratica	204	204	1	2e-48	100	2486	XM_011019291.1
S67	6117	lg12	192.7	lm_ll_5873
S68	6209	lg13	78.72	hk_hk_1264	PREDICTED: Populus euphratica 5'-3' exoribonuclease 4-like (LOC105110438), transcript variant X5, misc_RNA	Populus euphratica	165	165	0.8	1e-36	100	2659	XR_839476.1
S69	6556	lg14	79.98	hk_hk_3108	Populus trichocarpa clone 13838686 integrase mRNA, complete cds	Populus trichocarpa	182	182	1	1e-41	96.4	2640	DQ536167.1
S70	6606	lg14	86.35	lm_ll_7240
S71	7186	lg16	0	lm_ll_7848	PREDICTED: Populus euphratica probable inactive receptor kinase At5g58300 (LOC105108877), transcript variant X4, mRNA	Populus euphratica	204	204	1	2e-48	100	2349	XM_011003373.1
S72	7491	lg17	0.49	nn_np_7356	PREDICTED: Populus euphratica uncharacterized GPI-anchored protein At1g61900-like (LOC105142180), transcript variant X2, mRNA	Populus euphratica	204	204	1	2e-48	100	2026	XM_011049693.1
S73	7492	lg17	1.1	nn_np_10281	Populus trichocarpa clone POP050-O20, complete sequence	Populus trichocarpa	117	117	1	3e-22	86.36	115221	AC213495.1
S74	7639	lg17	64.81	hk_hk_1498
S75	7660	lg17	74.28	hk_hk_2528
S76	7701	lg17	91.42	hk_hk_2354	PREDICTED: Populus euphratica pentatricopeptide repeat-containing protein At4g21705, mitochondrial-like (LOC105129198), transcript variant X1, mRNA	Populus euphratica	204	204	1	2e-48	100	1927	XM_011031160.1
S77	7816	lg18	19.32	nn_np_5502
S78	7843	lg18	34.43	lm_ll_12799
S79	7866	lg18	51.27	hk_hk_3130	PREDICTED: Populus alba protein SUPPRESSOR OF K(+) TRANSPORT GROWTH DEFECT 1-like (LOC118060148), transcript variant X3, mRNA	Populus alba	204	204	1	2e-48	100	1000	XM_035073326.1
S80	7990	lg18	127.73	nn_np_11657
S81	7993	lg18	133.97	nn_np_9127	PREDICTED: Populus alba UBP1-associated protein 2C-like (LOC118062572), mRNA	Populus alba	198	198	1	1e-46	99.09	1688	XM_035076376.1
S82	7999	lg18	135.97	nn_np_8633
S83	8003	lg18	140.51	nn_np_381
S84	8004	lg18	144.34	hk_hk_1414
S85	8009	lg18	150.12	nn_np_10664
S86	8011	lg18	150.59	nn_np_6308	PREDICTED: Populus euphratica pentatricopeptide repeat-containing protein At2g33760-like (LOC105128035), mRNA	Populus euphratica	204	204	1	2e-48	100	2389	XM_011029532.1
S87	8016	lg18	153.52	hk_hk_1488	Populus trichocarpa clone Pop1-49O2, complete sequence	Populus trichocarpa	119	119	0.99	9e-23	86.36	76026	AC183429.2
S88	8020	lg18	154.4	hk_hk_3089	Populus trichocarpa clone Pop1-49O2, complete sequence	Populus trichocarpa	119	119	0.99	9e-23	86.36	76026	AC183429.2
S89	8245	lg19	84.22	hk_hk_2795	PREDICTED: Populus alba uncharacterized LOC118056755 (LOC118056755), ncRNA	Populus alba	156	156	0.9	7e-34	94.95	811	XR_004688845.1
S90	8246	lg19	84.22	hk_hk_861	Populus trichocarpa clone POP024-G19, complete sequence	Populus trichocarpa	102	272	0.55	9e-18	96.72	143599	AC216453.1
S91	8293	lg19	119.22	lm_ll_11569	Populus trichocarpa clone POP002-A24, complete sequence	Populus trichocarpa	176	176	1	5e-40	95.45	136622	AC212919.1
S92	8299	lg19	123.28	lm_ll_10633
S93	8305	lg19	130.26	lm_ll_12957
