# Supplementary material for: The Genetic Architecture of the Root System during Seedling Emergence in Populus euphratica under Salt Stress and Control Environments
Source: MDPI journal article supplement (doi:10.3390/app14062225), 2024-03-07
Supplement: s1 [file s1 › Table S3.pdf]

| labels | snpnames | Linkage | Genetic_Distances.cM. | Marker_ID   | Description                                                                                                      | Scientific Name            | Max_Score | Total_Score | Query_Cover | E_value  |
|--------|----------|---------|-----------------------|-------------|------------------------------------------------------------------------------------------------------------------|----------------------------|-----------|-------------|-------------|----------|
| S1     | 183      | lg1     | 105.78                | lm_ll_10323 | PREDICTED: <i>Populus trichocarpa</i> asparagine synthetase                                                      |                            |           |             |             |          |
| S2     | 369      | lg1     | 187.97                | lm_ll_11582 | [glutamine-hydrolyzing] 1 (LOC7496783), transcript variant X1, mRNA                                              | <i>Populus trichocarpa</i> | 126       | 126         | 61%         | 5.00E-25 |
| S3     | 667      | lg1     | 327.97                | hk_hk_1180  | PREDICTED: <i>Populus euphratica</i> uncharacterized                                                             |                            |           |             |             |          |
| S4     | 720      | lg1     | 356.2                 | hk_hk_1683  | LOC105121580 (LOC105121580), transcript variant X1, mRNA                                                         | <i>Populus euphratica</i>  | 204       | 204         | 100%        | 2.00E-48 |
| S5     | 1024     | lg2     | 12.84                 | nn_np_5659  | <i>Populus trichocarpa</i> clone POP073-O22, complete sequence                                                   | <i>Populus trichocarpa</i> | 187       | 344         | 100%        | 2.00E-43 |
| S6     | 1050     | lg2     | 32.28                 | nn_np_9026  | PREDICTED: <i>Populus euphratica</i> agamous-like MADS-box protein AGL6 (LOC105136119), mRNA                     | <i>Populus euphratica</i>  | 204       | 204         | 100%        | 2.00E-48 |
| S7     | 1051     | lg2     | 32.28                 | nn_np_10254 | <i>Populus alba</i> mitochondrion, complete sequence                                                             | <i>Populus alba</i>        | 154       | 154         | 78%         | 2.00E-33 |
| S8     | 1072     | lg2     | 43.96                 | nn_np_4242  |                                                                                                                  |                            |           |             |             |          |
| S9     | 1078     | lg2     | 48.94                 | nn_np_10480 | PREDICTED: <i>Populus alba</i> nuclear poly(A) polymerase 4-like (LOC118030661), transcript variant X2, misc_RNA | <i>Populus alba</i>        | 178       | 178         | 100%        | 1.00E-40 |
| S10    | 1083     | lg2     | 51.56                 | nn_np_8109  | <i>Populus trichocarpa</i> clone POP051-N24, complete sequence                                                   | <i>Populus trichocarpa</i> | 154       | 154         | 100%        | 2.00E-33 |
| S11    | 1538     | lg2     | 268.17                | hk_hk_1218  | PREDICTED: <i>Populus euphratica</i>                                                                             | <i>Populus euphratica</i>  | 163       | 163         | 82%         | 4.00E-36 |
| S12    | 1738     | lg3     | 48.99                 | lm_ll_6748  |                                                                                                                  |                            |           |             |             |          |

|     |      |     |        |                 |                                                                                                                     |                               |     |     |      |          |
|-----|------|-----|--------|-----------------|---------------------------------------------------------------------------------------------------------------------|-------------------------------|-----|-----|------|----------|
|     |      |     |        |                 | pentatricopeptide repeat-containing protein At2g42920, chloroplastic-like (LOC105126976), mRNA                      |                               |     |     |      |          |
| S13 | 1753 | lg3 | 58.05  | lm_ll_1118<br>2 |                                                                                                                     |                               |     |     |      |          |
| S14 | 1755 | lg3 | 58.05  | lm_ll_6387      |                                                                                                                     |                               |     |     |      |          |
| S15 | 1756 | lg3 | 58.05  | lm_ll_8169      |                                                                                                                     |                               |     |     |      |          |
| S16 | 1764 | lg3 | 62.67  | lm_ll_1092<br>6 | PREDICTED: <i>Populus trichocarpa</i> nuclear speckle RNA-binding protein B (LOC7466409), mRNA                      | <i>Populus trichocarpa</i>    | 198 | 198 | 100% | 1.00E-46 |
| S17 | 1905 | lg3 | 141.37 | nn_np_261<br>7  | PREDICTED: <i>Populus euphratica</i> uncharacterized LOC105120648 (LOC105120648), mRNA                              | <i>Populus euphratica</i>     | 204 | 204 | 100% | 2.00E-48 |
| S18 | 2434 | lg4 | 131.52 | hk_hk_399       | PREDICTED: <i>Phalaenopsis equestris</i> uncharacterized LOC110037592 (LOC110037592), partial mRNA                  | <i>Phalaenopsis equestris</i> | 159 | 159 | 100% | 5.00E-35 |
| S19 | 3061 | lg5 | 146.07 | hk_hk_866       |                                                                                                                     |                               |     |     |      |          |
| S20 | 3863 | lg7 | 69.45  | lm_ll_1237<br>3 |                                                                                                                     |                               |     |     |      |          |
| S21 | 3865 | lg7 | 71.24  | lm_ll_8640      | PREDICTED: <i>Populus trichocarpa</i> uncharacterized LOC7472443 (LOC7472443), transcript variant X3, misc_RNA      | <i>Populus trichocarpa</i>    | 100 | 100 | 49%  | 3.00E-17 |
| S22 | 3913 | lg7 | 106.76 | lm_ll_1102<br>3 | PREDICTED: <i>Populus euphratica</i> probable enoyl-CoA hydratase, mitochondrial (LOC105122438), mRNA               | <i>Populus euphratica</i>     | 113 | 113 | 58%  | 4.00E-21 |
| S23 | 4608 | lg8 | 155.07 | lm_ll_1245<br>5 |                                                                                                                     |                               |     |     |      |          |
| S24 | 4757 | lg9 | 84.26  | hk_hk_113<br>5  | PREDICTED: <i>Populus euphratica</i> probable RNA-dependent RNA polymerase 5 (LOC105126434), transcript variant X2, | <i>Populus euphratica</i>     | 161 | 161 | 81%  | 1.00E-35 |

|     |      |      |        |            |                                   |                            |     |     |      |          |  |
|-----|------|------|--------|------------|-----------------------------------|----------------------------|-----|-----|------|----------|--|
|     |      |      |        |            | mRNA                              |                            |     |     |      |          |  |
|     |      |      |        |            | PREDICTED: <i>Populus</i>         |                            |     |     |      |          |  |
| S25 | 5065 | lg10 | 19.13  | hk_hk_211  | <i>trichocarpa</i> peroxisomal    |                            |     |     |      |          |  |
|     |      |      |        | 3          | 2,4-dienoyl-CoA reductase         |                            |     |     |      |          |  |
|     |      |      |        |            | (LOC7482193), mRNA                | <i>Populus trichocarpa</i> | 204 | 204 | 100% | 2.00E-48 |  |
|     |      |      |        |            | PREDICTED: <i>Populus</i>         |                            |     |     |      |          |  |
|     |      |      |        |            | <i>euphratica</i> COMM            |                            |     |     |      |          |  |
| S26 | 5128 | lg10 | 48.49  | hk_hk_139  | domain-containing                 |                            |     |     |      |          |  |
|     |      |      |        | 1          | protein 9-like                    |                            |     |     |      |          |  |
|     |      |      |        |            | (LOC105139428),                   |                            |     |     |      |          |  |
|     |      |      |        |            | transcript variant X2,            |                            |     |     |      |          |  |
|     |      |      |        |            | misc_RNA                          | <i>Populus euphratica</i>  | 174 | 174 | 88%  | 2.00E-39 |  |
|     |      |      |        |            | <i>Populus trichocarpa</i> clone  |                            |     |     |      |          |  |
| S27 | 5132 | lg10 | 48.95  | hk_hk_269  | POP033-D24, complete              |                            |     |     |      |          |  |
|     |      |      |        | 5          | sequence                          | <i>Populus trichocarpa</i> | 124 | 124 | 100% | 2.00E-24 |  |
| S28 | 6050 | lg12 | 142.29 | lm_ll_7965 |                                   |                            |     |     |      |          |  |
| S29 | 6237 | lg13 | 95.91  | lm_ll_1307 |                                   |                            |     |     |      |          |  |
|     |      |      |        | 6          |                                   |                            |     |     |      |          |  |
|     |      |      |        |            | PREDICTED: <i>Populus</i>         |                            |     |     |      |          |  |
| S30 | 6238 | lg13 | 95.91  | lm_ll_4077 | <i>euphratica</i> uncharacterized |                            |     |     |      |          |  |
|     |      |      |        |            | LOC105132545                      |                            |     |     |      |          |  |
|     |      |      |        |            | (LOC105132545), ncRNA             | <i>Populus euphratica</i>  | 204 | 204 | 100% | 2.00E-48 |  |
| S31 | 6241 | lg13 | 98.81  | lm_ll_7261 |                                   |                            |     |     |      |          |  |
|     |      |      |        |            | PREDICTED: <i>Populus</i>         |                            |     |     |      |          |  |
|     |      |      |        |            | <i>euphratica</i> random slug     |                            |     |     |      |          |  |
| S32 | 6260 | lg13 | 108.35 | lm_ll_1007 | protein 5-like                    |                            |     |     |      |          |  |
|     |      |      |        | 9          | (LOC105141521),                   |                            |     |     |      |          |  |
|     |      |      |        |            | transcript variant X3,            |                            |     |     |      |          |  |
|     |      |      |        |            | mRNA                              | <i>Populus euphratica</i>  | 204 | 204 | 100% | 2.00E-48 |  |
|     |      |      |        |            | <i>Populus trichocarpa</i> clone  |                            |     |     |      |          |  |
| S33 | 6298 | lg13 | 118.81 | lm_ll_6984 | POP024-G19, complete              |                            |     |     |      |          |  |
|     |      |      |        |            | sequence                          | <i>Populus trichocarpa</i> | 182 | 340 | 100% | 1.00E-41 |  |
| S34 | 6309 | lg13 | 118.81 | lm_ll_6982 |                                   |                            |     |     |      |          |  |
|     |      |      |        |            | <i>Populus trichocarpa</i> clone  |                            |     |     |      |          |  |
| S35 | 6322 | lg13 | 122.06 | lm_ll_931  | JGIACSB21-D15, complete           |                            |     |     |      |          |  |
|     |      |      |        |            | sequence                          | <i>Populus trichocarpa</i> | 154 | 154 | 100% | 2.00E-33 |  |
|     |      |      |        |            | PREDICTED: <i>Populus</i>         |                            |     |     |      |          |  |
| S36 | 6330 | lg13 | 124.43 | lm_ll_4594 | <i>euphratica</i> uncharacterized |                            |     |     |      |          |  |
|     |      |      |        |            | LOC105112383                      |                            |     |     |      |          |  |
|     |      |      |        |            | (LOC105112383), mRNA              | <i>Populus euphratica</i>  | 128 | 128 | 81%  | 1.00E-25 |  |
|     |      |      |        |            | PREDICTED: <i>Populus</i>         |                            |     |     |      |          |  |
| S37 | 6369 | lg13 | 131    | lm_ll_6031 | <i>trichocarpa</i>                |                            |     |     |      |          |  |
|     |      |      |        |            | uncharacterized                   |                            |     |     |      |          |  |
|     |      |      |        |            | LOC18104421                       | <i>Populus trichocarpa</i> | 198 | 198 | 100% | 1.00E-46 |  |

|     |      |      |        |             |                                                                                                                                  |                            |     |     |      |          |
|-----|------|------|--------|-------------|----------------------------------------------------------------------------------------------------------------------------------|----------------------------|-----|-----|------|----------|
| S38 | 6377 | lg13 | 132    | lm_ll_7344  | (LOC18104421), mRNA                                                                                                              |                            |     |     |      |          |
| S39 | 7043 | lg15 | 72.12  | lm_ll_12024 | PREDICTED: <i>Populus euphratica</i> uncharacterized LOC105111429 (LOC105111429), mRNA                                           | <i>Populus euphratica</i>  | 204 | 204 | 100% | 2.00E-48 |
| S40 | 8011 | lg18 | 150.59 | nn_np_6308  | PREDICTED: <i>Populus euphratica</i> pentatricopeptide repeat-containing protein At2g33760-like (LOC105128035), mRNA             | <i>Populus euphratica</i>  | 204 | 204 | 100% | 2.00E-48 |
| S41 | 8044 | lg18 | 168.11 | nn_np_8035  | PREDICTED: <i>Populus trichocarpa</i> probable pyruvate, phosphate dikinase regulatory protein, chloroplastic (LOC7458550), mRNA | <i>Populus trichocarpa</i> | 198 | 198 | 100% | 1.00E-46 |
| S42 | 8057 | lg18 | 177.14 | nn_np_10502 |                                                                                                                                  |                            |     |     |      |          |
| S43 | 8062 | lg18 | 180.14 | nn_np_4862  | PREDICTED: <i>Populus euphratica</i> cytochrome b561 and DOMON domain-containing protein At5g35735-like (LOC105141447), mRNA     | <i>Populus euphratica</i>  | 198 | 198 | 100% | 1.00E-46 |
| S44 | 8072 | lg18 | 184.27 | nn_np_2539  | <i>Populus trichocarpa</i> clone POP106-O02, complete sequence                                                                   | <i>Populus trichocarpa</i> | 174 | 174 | 99%  | 2.00E-39 |
