# Supplementary material for: The Genetic Architecture of the Root System during Seedling Emergence in Populus euphratica under Salt Stress and Control Environments
Source: MDPI journal article supplement (doi:10.3390/app14062225), 2024-03-07
Supplement: s1 [file s1 › Table S3.xlsx]

## Sheet: Sheet1
labels	snpnames	Linkage	Genetic_Distances.cM.	Marker_ID	Description	Scientific Name	Max Score	Total Score	Query Cover	E value	Per. ident	Acc. Len	Accession
S1	183	lg1	105.78	lm_ll_10323
S2	369	lg1	187.97	lm_ll_11582	PREDICTED: Populus trichocarpa asparagine synthetase [glutamine-hydrolyzing] 1 (LOC7496783), transcript variant X1, mRNA	Populus trichocarpa	126	126	0.61	5e-25	100	2221	XM_024605576.1
S3	667	lg1	327.97	hk_hk_1180
S4	720	lg1	356.2	hk_hk_1683	PREDICTED: Populus euphratica uncharacterized LOC105121580 (LOC105121580), transcript variant X1, mRNA	Populus euphratica	204	204	1	2e-48	100	1640	XM_011020283.1
S5	1024	lg2	12.84	nn_np_5659	Populus trichocarpa clone POP073-O22, complete sequence	Populus trichocarpa	187	344	1	2e-43	97.27	91372	AC209188.1
S6	1050	lg2	32.28	nn_np_9026	PREDICTED: Populus euphratica agamous-like MADS-box protein AGL6 (LOC105136119), mRNA	Populus euphratica	204	204	1	2e-48	100	1985	XM_011041323.1
S7	1051	lg2	32.28	nn_np_10254	Populus alba mitochondrion, complete sequence	Populus alba	154	154	0.78	2e-33	98.84	838420	NC_041085.1
S8	1072	lg2	43.96	nn_np_4242
S9	1078	lg2	48.94	nn_np_10480
S10	1083	lg2	51.56	nn_np_8109	PREDICTED: Populus alba nuclear poly(A) polymerase 4-like (LOC118030661), transcript variant X2, misc_RNA	Populus alba	178	178	1	1e-40	95.54	3345	XR_004684368.1
S11	1538	lg2	268.17	hk_hk_1218	Populus trichocarpa clone POP051-N24, complete sequence	Populus trichocarpa	154	154	1	2e-33	91.82	149966	AC216943.1
S12	1738	lg3	48.99	lm_ll_6748	PREDICTED: Populus euphratica pentatricopeptide repeat-containing protein At2g42920, chloroplastic-like (LOC105126976), mRNA	Populus euphratica	163	163	0.82	4e-36	98.9	588	XM_011028035.1
S13	1753	lg3	58.05	lm_ll_11182
S14	1755	lg3	58.05	lm_ll_6387
S15	1756	lg3	58.05	lm_ll_8169
S16	1764	lg3	62.67	lm_ll_10926	PREDICTED: Populus trichocarpa nuclear speckle RNA-binding protein B (LOC7466409), mRNA	Populus trichocarpa	198	198	1	1e-46	99.09	906	XM_024595495.1
S17	1905	lg3	141.37	nn_np_2617	PREDICTED: Populus euphratica uncharacterized LOC105120648 (LOC105120648), mRNA	Populus euphratica	204	204	1	2e-48	100	2195	XM_011018929.1
S18	2434	lg4	131.52	hk_hk_399	PREDICTED: Phalaenopsis equestris uncharacterized LOC110037592 (LOC110037592), partial mRNA	Phalaenopsis equestris	159	159	1	5e-35	92.73	1380	XM_020742278.1
S19	3061	lg5	146.07	hk_hk_866
S20	3863	lg7	69.45	lm_ll_12373
S21	3865	lg7	71.24	lm_ll_8640	PREDICTED: Populus trichocarpa uncharacterized LOC7472443 (LOC7472443), transcript variant X3, misc_RNA	Populus trichocarpa	100	100	0.49	3e-17	100	1489	XR_002983294.1
S22	3913	lg7	106.76	lm_ll_11023	PREDICTED: Populus euphratica probable enoyl-CoA hydratase, mitochondrial (LOC105122438), mRNA	Populus euphratica	113	113	0.58	4e-21	98.44	1096	XM_011021540.1
S23	4608	lg8	155.07	lm_ll_12455
S24	4757	lg9	84.26	hk_hk_1135	PREDICTED: Populus euphratica probable RNA-dependent RNA polymerase 5 (LOC105126434), transcript variant X2, mRNA	Populus euphratica	161	161	0.81	1e-35	98.89	3208	XM_011027304.1
S25	5065	lg10	19.13	hk_hk_2113	PREDICTED: Populus trichocarpa peroxisomal 2,4-dienoyl-CoA reductase (LOC7482193), mRNA	Populus trichocarpa	204	204	1	2e-48	100	1304	XM_002318254.3
S26	5128	lg10	48.49	hk_hk_1391	PREDICTED: Populus euphratica COMM domain-containing protein 9-like (LOC105139428), transcript variant X2, misc_RNA	Populus euphratica	174	174	0.88	2e-39	98.97	1287	XR_844974.1
S27	5132	lg10	48.95	hk_hk_2695	Populus trichocarpa clone POP033-D24, complete sequence	Populus trichocarpa	124	124	1	2e-24	86.78	139267	AC213420.1
S28	6050	lg12	142.29	lm_ll_7965
S29	6237	lg13	95.91	lm_ll_13076
S30	6238	lg13	95.91	lm_ll_4077	PREDICTED: Populus euphratica uncharacterized LOC105132545 (LOC105132545), ncRNA	Populus euphratica	204	204	1	2e-48	100	1271	XR_843594.1
S31	6241	lg13	98.81	lm_ll_7261
S32	6260	lg13	108.35	lm_ll_10079	PREDICTED: Populus euphratica random slug protein 5-like (LOC105141521), transcript variant X3, mRNA	Populus euphratica	204	204	1	2e-48	100	1711	XM_011048767.1
S33	6298	lg13	118.81	lm_ll_6984	Populus trichocarpa clone POP024-G19, complete sequence	Populus trichocarpa	182	340	1	1e-41	96.36	143599	AC216453.1
S34	6309	lg13	118.81	lm_ll_6982
S35	6322	lg13	122.06	lm_ll_931	Populus trichocarpa clone JGIACSB21-D15, complete sequence	Populus trichocarpa	154	154	1	2e-33	91.82	40251	AC208316.1
S36	6330	lg13	124.43	lm_ll_4594	PREDICTED: Populus euphratica uncharacterized LOC105112383 (LOC105112383), mRNA	Populus euphratica	128	128	0.81	1e-25	92.22	1440	XM_011008079.1
S37	6369	lg13	131	lm_ll_6031	PREDICTED: Populus trichocarpa uncharacterized LOC18104421 (LOC18104421), mRNA	Populus trichocarpa	198	198	1	1e-46	99.09	975	XM_006376188.2
S38	6377	lg13	132	lm_ll_7344
S39	7043	lg15	72.12	lm_ll_12024	PREDICTED: Populus euphratica uncharacterized LOC105111429 (LOC105111429), mRNA	Populus euphratica	204	204	1	2e-48	100	1273	XM_011006772.1
S40	8011	lg18	150.59	nn_np_6308	PREDICTED: Populus euphratica pentatricopeptide repeat-containing protein At2g33760-like (LOC105128035), mRNA	Populus euphratica	204	204	1	2e-48	100	2389	XM_011029532.1
S41	8044	lg18	168.11	nn_np_8035	PREDICTED: Populus trichocarpa probable pyruvate, phosphate dikinase regulatory protein, chloroplastic (LOC7458550), mRNA	Populus trichocarpa	198	198	1	1e-46	99.09	1557	XM_002304896.3
S42	8057	lg18	177.14	nn_np_10502
S43	8062	lg18	180.14	nn_np_4862	PREDICTED: Populus euphratica cytochrome b561 and DOMON domain-containing protein At5g35735-like (LOC105141447), mRNA	Populus euphratica	198	198	1	1e-46	99.09	959	XM_011048670.1
S44	8072	lg18	184.27	nn_np_2539	Populus trichocarpa clone POP106-O02, complete sequence	Populus trichocarpa	174	174	0.99	2e-39	95.41	107219	AC212852.1
