# Supplementary figures and images for: The Genetic Architecture of the Root System during Seedling Emergence in Populus euphratica under Salt Stress and Control Environments
Source: MDPI journal article supplement (doi:10.3390/app14062225), 2024-03-07

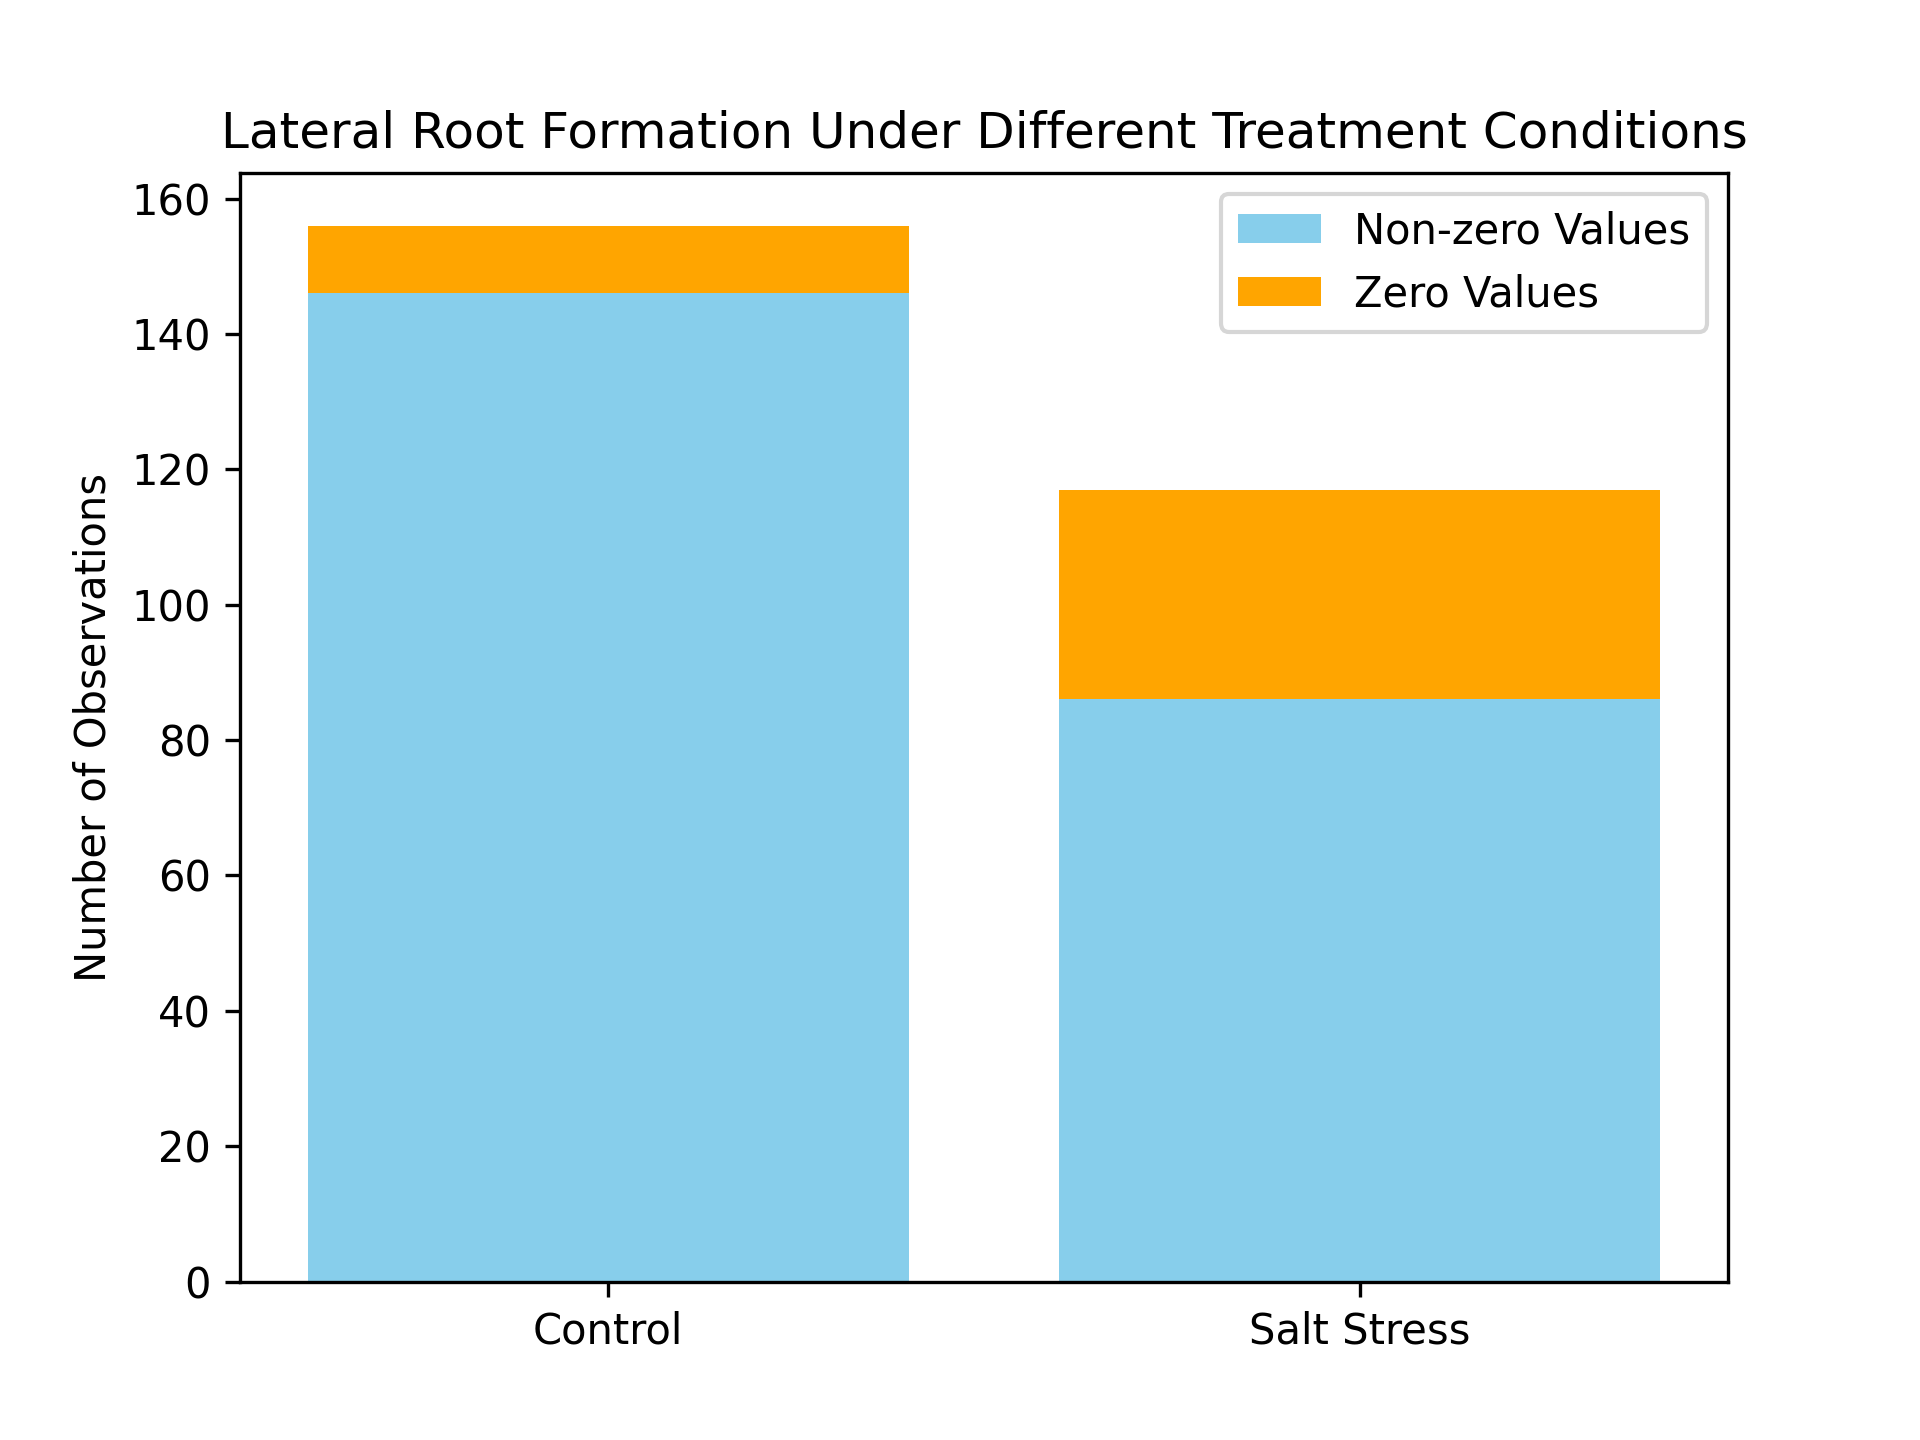

Supplement: s1 [file s1 › Figure S1.tiff]

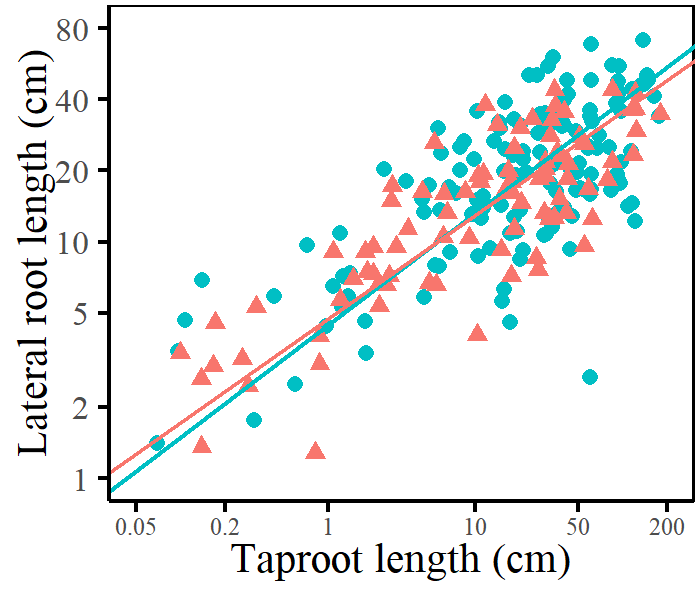

Supplement: s1 [file s1 › Figure S2a.tif]

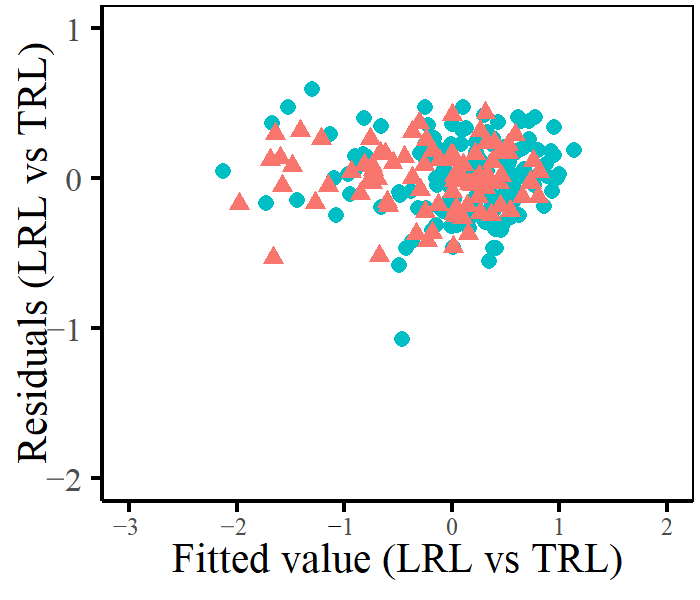

Supplement: s1 [file s1 › Figure S2b.tif]

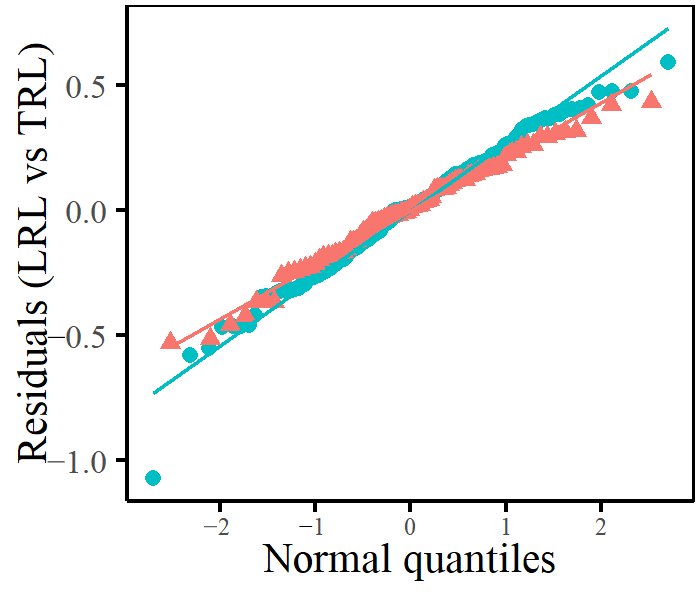

Supplement: s1 [file s1 › Figure S2c.tif]
